# Supplementary material
Source: PubMed Central journal article supplement (PMC10363227)
Supplement: NIHMS1882049-supplement-supinfo.pdf [file NIHMS1882049-supplement-supinfo.pdf]

## APPENDIX

**Supplementary Table S1** Frequency of reported care delivery approaches and barriers for surveyed SNFs

|                                                   | Surveyed SNFs<br>n = 377 |
|---------------------------------------------------|--------------------------|
|                                                   | % or mean                |
| <b>Care Delivery Approaches</b>                   | 16.8                     |
| Condition-specific care pathways/protocols        | 63.8%                    |
| Data analytics to identify high-risk residents    | 75.1%                    |
| Huddles or team review of patient census          | 97.9%                    |
| Use of MD or NP focused on SNF care               | 82.5%                    |
| Education on shorter length of stay               | 84.5%                    |
| Medication reconciliation on discharge            | 97.2%                    |
| Use of discharge check list                       | 95.7%                    |
| Post-discharge follow-up on clinical needs        | 74.7%                    |
| Post-discharge follow-up on PCP appointment       | 55.4%                    |
| Selective referral to HHAs based on quality       | 69.0%                    |
| Care pathways to reduce readmissions              | 77.2%                    |
| Formal screening for SDoH                         | 70.5%                    |
| Formal processes to directly address SDoH         | 66.4%                    |
| Post-discharge referrals to community resources   | 89.5%                    |
| Staff training on patients with cognitive decline | 87.0%                    |
| Dementia focused short stay unit                  | 17.9%                    |
| Dementia occupational therapy                     | 58.8%                    |
| Tracking of hospital readmissions during stay     | 93.8%                    |
| Tracking of hospital readmissions post-discharge  | 72.1%                    |
| Tracking of repeat ED visits during stay          | 90.7%                    |
| Tracking of repeat ED visits post-discharge       | 47.7%                    |
| Tracking of PCP follow-up post-discharge          | 44.7%                    |
| Patient experience surveys                        | 76.7%                    |
| <b>Barriers</b>                                   | 5.0                      |
| Lack of access to non-emergent transport          | 34.2%                    |
| Inadequate availability of high-quality HHA       | 15.3%                    |
| Lack of patient social support                    | 66.1%                    |
| Inadequate mental health services                 | 65.1%                    |
| Inadequate substance abuse services               | 46.7%                    |
| Difficulty in forging affiliations with hospitals | 15.0%                    |
| Difficulty in forging affiliations with HHAs      | 12.2%                    |
| Lack of staff buy in for changes                  | 23.4%                    |

|                                             |       |
|---------------------------------------------|-------|
| Lack of funding for new programs            | 38.7% |
| Lack of data to assess facility quality     | 17.7% |
| Lack of personnel to support care adoptions | 50.5% |
| Staff turnover and burnout                  | 73.8% |

*Note:* ED is emergency department. EHR is electronic health record. HHA is home health agency. MD is medical doctor. NP is nurse practitioner. PCP is primary care physician. SDoH is social determinants of health. SNF is skilled nursing facility.

**Supplementary Table S2** Position of survey respondents

| <b>Respondent position</b>      | <b>Freq.</b> | <b>Percent</b> |
|---------------------------------|--------------|----------------|
| SNF Administrator               | 254          | 67.37          |
| Executive Director              | 59           | 15.65          |
| missing                         | 36           | 9.55           |
| Director of Nursing             | 23           | 6.1            |
| Admissions Nurse                | 1            | 0.27           |
| Director of Safety              | 1            | 0.27           |
| Interim Director of Nursing     | 1            | 0.27           |
| Regional Director of Operations | 1            | 0.27           |
| Assistant Director of Nursing   | 1            | 0.27           |

**Supplementary Table S3** Characteristics of SNF Survey Respondents and SNF Survey Non-Respondents (Table)

| <b>Variables</b>                   | <b>Contacted SNFs</b> | <b>Respondents</b> | <b>Non-Respondents</b> |                |
|------------------------------------|-----------------------|--------------------|------------------------|----------------|
|                                    | <b>% or mean</b>      | <b>% or mean</b>   | <b>% or mean</b>       | <b>p-value</b> |
| N of SNFs                          | 693                   | 377                | 316                    |                |
| Ownership status                   |                       |                    |                        |                |
| Not for profit                     | 28.8%                 | 27.0%              | 30.7%                  | 0.46           |
| Government                         | 4.0%                  | 4.6%               | 3.4%                   | 0.51           |
| For profit                         | 67.2%                 | 68.3%              | 66.0%                  | 0.64           |
| Urban                              |                       |                    |                        |                |
| large metro                        | 41.6%                 | 41.3%              | 41.9%                  | 0.92           |
| medium/small metro                 | 32.7%                 | 31.5%              | 34.1%                  | 0.61           |
| micropolitan/non-core              | 25.7%                 | 27.2%              | 23.9%                  | 0.47           |
| Number of residents                | 100.4                 | 96.3               | 104.9                  | 0.42           |
| Number of federally certified beds | 111.4                 | 109.2              | 113.9                  | 0.57           |
| SNF in chain                       | 58.9%                 | 54.8%              | 63.5%                  | 0.10           |
| SNF hospital based                 | 5.9%                  | 5.3%               | 6.6%                   | 0.67           |
| Region                             |                       |                    |                        |                |
| West                               | 12.9%                 | 16.0%              | 9.4%                   | 0.04           |
| Northeast                          | 19.2%                 | 19.0%              | 19.3%                  | 0.94           |
| Midwest                            | 32.1%                 | 33.3%              | 30.7%                  | 0.59           |
| South                              | 35.9%                 | 31.6%              | 40.6%                  | 0.09           |
| Overall quality rating             | 3.1                   | 3.1                | 3.1                    | 0.61           |

*Note:* Pearson chi-square tests performed for ownership status, urban location, chain membership, hospital-based, and region. *T*-tests performed for number of residents, number of federally certified beds, and overall quality rating.

**Supplementary Table S4** Regression estimates of the association between facility-level characteristics and the number of barriers and care delivery approaches reported by SNF survey respondents

|                                                          | <b>(1)</b><br><b>care delivery</b><br><b>approaches</b> |          | <b>(2)</b><br><b>barriers</b> |          |
|----------------------------------------------------------|---------------------------------------------------------|----------|-------------------------------|----------|
| BPCI/ACO status (ref: both)                              |                                                         |          |                               |          |
| BPCI only                                                | 1.025                                                   | (0.6646) | 0.996                         | (0.9784) |
| Neither                                                  | 0.975                                                   | (0.4127) | 0.829                         | (0.0206) |
| Assisted Living Facility                                 | 1.030                                                   | (0.4979) | 0.924                         | (0.5713) |
| Ownership (ref: Non-Profit)                              |                                                         |          |                               |          |
| Government                                               | 1.103                                                   | (0.2999) | 0.867                         | (0.4068) |
| For Profit                                               | 1.114                                                   | (0.0099) | 0.994                         | (0.9569) |
| Chain Membership (ref: No)                               |                                                         |          |                               |          |
| Yes                                                      | 1.045                                                   | (0.2582) | 0.790                         | (0.0142) |
| Number of Certified Beds                                 | 1.021                                                   | (0.0543) | 0.975                         | (0.5265) |
| Average Number of Residents per Day                      | 1.034                                                   | (0.1127) | 0.967                         | (0.5158) |
| Continuing Care Retirement Community (ref: no)           | 1.007                                                   | (0.9203) | 1.139                         | (0.4404) |
| Quality (ref: 1-2 Star)                                  |                                                         |          |                               |          |
| 3 Star                                                   | 1.039                                                   | (0.4062) | 0.758                         | (0.0161) |
| 4-5 Star                                                 | 1.067                                                   | (0.0713) | 0.821                         | (0.0530) |
| Percent Minority                                         | 0.949                                                   | (0.0198) | 0.913                         | (0.0306) |
| Reported Total Nurse Staffing Hours per Resident per Day | 0.938                                                   | (0.0009) | 0.936                         | (0.2172) |
| Percent Medicaid                                         | 1.024                                                   | (0.3700) | 1.105                         | (0.0783) |
| Urban (ref: micropolitan/non-core)                       |                                                         |          |                               |          |
| large metro                                              | 1.084                                                   | (0.0712) | 0.932                         | (0.5244) |
| small/medium metro                                       | 1.071                                                   | (0.1236) | 0.996                         | (0.9717) |

*Note:* Results are from a Poisson model with estimated coefficients expressed as a factor change in the expected count for a 1 unit increase in X. Continuous variables are standardized as the factor change in the expected count for a 1 standard deviation increase in X. N = 301. P-values in parenthesis. BPCI is bundled payments for care improvement. ACO is accountable care organization.

**Supplementary Table S5** Pooled regression estimates from 10 multiply imputed datasets of the association between facility-level characteristics and the number of care delivery approaches and barriers reported by SNF survey respondents

|                                                          | <b>(1)</b><br><b>care delivery</b><br><b>approaches</b> |          | <b>(2)</b><br><b>barriers</b> |          |
|----------------------------------------------------------|---------------------------------------------------------|----------|-------------------------------|----------|
| BPCI/ACO status (ref: both)                              |                                                         |          |                               |          |
| BPCI only                                                | 1.005                                                   | (0.9226) | 0.908                         | (0.5597) |
| Neither                                                  | 0.964                                                   | (0.1946) | 0.808                         | (0.0073) |
| Assisted Living Facility                                 | 1.017                                                   | (0.6900) | 0.932                         | (0.6060) |
| Ownership (ref: Non-Profit)                              |                                                         |          |                               |          |
| Government                                               | 1.052                                                   | (0.5698) | 0.911                         | (0.5536) |
| For Profit                                               | 1.073                                                   | (0.1174) | 0.985                         | (0.8892) |
| Chain Membership (ref: No)                               |                                                         |          |                               |          |
| Yes                                                      | 1.040                                                   | (0.2784) | 0.773                         | (0.0056) |
| Number of Certified Beds                                 | 1.020                                                   | (0.0364) | 0.967                         | (0.3457) |
| Average Number of Residents per Day                      | 1.038                                                   | (0.0453) | 0.968                         | (0.4985) |
| Continuing Care Retirement Community                     | 1.023                                                   | (0.6990) | 1.144                         | (0.3910) |
| Quality (ref: 1-2 Star)                                  |                                                         |          |                               |          |
| 3 Star                                                   | 1.031                                                   | (0.4698) | 0.772                         | (0.0275) |
| 4-5 Star                                                 | 1.054                                                   | (0.1297) | 0.823                         | (0.0427) |
| Percent Minority                                         | 0.956                                                   | (0.0399) | 0.899                         | (0.0258) |
| Reported Total Nurse Staffing Hours per Resident per Day | 0.940                                                   | (0.0005) | 0.930                         | (0.1421) |
| Percent Medicaid                                         | 1.027                                                   | (0.2489) | 1.057                         | (0.3015) |
| Urban (ref: micropolitan/non-core)                       |                                                         |          |                               |          |
| large metro                                              | 1.076                                                   | (0.0799) | 0.975                         | (0.8184) |
| small/medium metro                                       | 1.044                                                   | (0.3031) | 1.086                         | (0.4514) |

*Note:* Pooled regression results from ten multiply imputed datasets. Poisson model with estimated coefficients expressed as a factor change in the expected count for a 1 unit increase in X. Continuous variables are standardized as the factor change in the expected count for a 1 standard deviation increase in X. P-values in parenthesis. BPCI is bundled payments for care improvement. ACO is accountable care organization.

**Supplementary Table S6** Frequency of reported care delivery approaches and barriers by BPCI participation

|                                                   | <b>BPCI Participation</b><br>n = 377 |                                         |                |
|---------------------------------------------------|--------------------------------------|-----------------------------------------|----------------|
|                                                   | <b>BPCI</b><br>n = 179<br>% = 47.5   | <b>Non-BPCI</b><br>n = 198<br>% = 55.52 | <b>p-value</b> |
|                                                   | <b>% or mean</b>                     | <b>% or mean</b>                        |                |
| <b>Care Delivery Approaches</b>                   | 18.2                                 | 16.7                                    |                |
| Condition-specific care pathways/protocols        | 79.0%                                | 62.6%                                   | 0.00           |
| Data analytics to identify high-risk residents    | 78.7%                                | 74.9%                                   | 0.41           |
| Huddles or team review of patient census          | 98.2%                                | 97.9%                                   | 0.81           |
| Use of MD or NP focused on SNF care               | 94.1%                                | 81.6%                                   | 0.00           |
| Education on shorter length of stay               | 86.8%                                | 84.4%                                   | 0.53           |
| Medication reconciliation on discharge            | 98.4%                                | 97.1%                                   | 0.40           |
| Use of discharge check list                       | 96.8%                                | 95.6%                                   | 0.57           |
| Post-discharge follow-up on clinical needs        | 84.7%                                | 74.0%                                   | 0.02           |
| Post-discharge follow-up on PCP appointment       | 67.1%                                | 54.5%                                   | 0.02           |
| Selective referral to HHAs based on quality       | 71.6%                                | 68.8%                                   | 0.58           |
| Care pathways to reduce readmissions              | 90.8%                                | 76.2%                                   | 0.00           |
| Formal screening for SDoH                         | 75.8%                                | 70.1%                                   | 0.26           |
| Formal processes to directly address SDoH         | 75.0%                                | 65.7%                                   | 0.07           |
| Post-discharge referrals to community resources   | 87.7%                                | 89.6%                                   | 0.54           |
| Staff training on patients with cognitive decline | 83.8%                                | 87.2%                                   | 0.35           |
| Dementia focused short stay unit                  | 20.5%                                | 17.7%                                   | 0.53           |
| Dementia occupational therapy                     | 62.3%                                | 58.5%                                   | 0.50           |
| Tracking of hospital readmissions during stay     | 98.4%                                | 93.4%                                   | 0.02           |
| Tracking of hospital readmissions post-discharge  | 81.3%                                | 71.4%                                   | 0.03           |
| Tracking of repeat ED visits during stay          | 97.7%                                | 90.2%                                   | 0.00           |
| Tracking of repeat ED visits post-discharge       | 61.1%                                | 46.6%                                   | 0.01           |
| Tracking of PCP follow-up post-discharge          | 51.7%                                | 44.2%                                   | 0.18           |
| Patient experience surveys                        | 85.8%                                | 76.0%                                   | 0.03           |
| <b>Barriers</b>                                   | 5.5                                  | 4.9                                     |                |
| Lack of access to non-emergent transport          | 47.0%                                | 33.2%                                   | 0.01           |
| Inadequate availability of high-quality HHA       | 18.9%                                | 15.1%                                   | 0.37           |
| Lack of patient social support                    | 74.4%                                | 65.4%                                   | 0.09           |
| Inadequate mental health services                 | 56.6%                                | 65.8%                                   | 0.09           |

|                                                   |       |       |      |
|---------------------------------------------------|-------|-------|------|
| Inadequate substance abuse services               | 50.9% | 46.4% | 0.42 |
| Difficulty in forging affiliations with hospitals | 16.6% | 14.9% | 0.67 |
| Difficulty in forging affiliations with HHAs      | 12.3% | 12.2% | 0.98 |
| Lack of staff buy in for changes                  | 35.2% | 22.5% | 0.01 |
| Lack of funding for new programs                  | 45.6% | 38.2% | 0.17 |
| Lack of data to assess facility quality           | 16.9% | 17.7% | 0.83 |
| Lack of personnel to support care adoptions       | 54.3% | 50.2% | 0.47 |
| Staff turnover and burnout                        | 76.5% | 73.6% | 0.57 |

*Note:* Pearson Chi-square tests performed. ED is emergency department. EHR is electronic health record. HHA is home health agency. MD is medical doctor. NP is nurse practitioner. PCP is primary care physician. SDoH is social determinants of health. SNF is skilled nursing facility.

**Supplementary Table S7** Frequency of reported care delivery approaches and barriers by ownership type

|                                                   | Ownership<br>n = 375              |                                                 |         | Chain Membership<br>n=368 |                            |         |
|---------------------------------------------------|-----------------------------------|-------------------------------------------------|---------|---------------------------|----------------------------|---------|
|                                                   | For-Profit<br>n = 289<br>% = 77.1 | Government/<br>Non-Profit<br>n = 86<br>% = 22.9 | p-value | No<br>n = 139<br>% = 37.8 | Yes<br>n = 229<br>% = 62.2 | p-value |
|                                                   | % or<br>mean                      | % or<br>mean                                    |         | % or<br>mean              | % or<br>mean               |         |
| <b>Care Delivery Approaches</b>                   | 17.4                              | 15.5                                            |         | 16.1                      | 17.2                       |         |
| Condition-specific care pathways/protocols        | 72.1%                             | 44.8%                                           | 0.00    | 63.6%                     | 63.3%                      | 0.96    |
| Data analytics to identify high-risk residents    | 80.7%                             | 62.5%                                           | 0.01    | 72.8%                     | 75.8%                      | 0.62    |
| Huddles or team review of patient census          | 97.6%                             | 98.7%                                           | 0.56    | 98.3%                     | 97.5%                      | 0.63    |
| Use of MD or NP focused on SNF care               | 83.8%                             | 79.2%                                           | 0.43    | 78.7%                     | 84.7%                      | 0.30    |
| Education on shorter length of stay               | 87.1%                             | 78.6%                                           | 0.10    | 77.6%                     | 90.1%                      | 0.01    |
| Medication reconciliation on discharge            | 97.5%                             | 96.5%                                           | 0.68    | 97.3%                     | 97.1%                      | 0.92    |
| Use of discharge check list                       | 94.4%                             | 98.4%                                           | 0.11    | 96.4%                     | 94.9%                      | 0.56    |
| Post-discharge follow-up on clinical needs        | 77.8%                             | 69.4%                                           | 0.20    | 68.4%                     | 79.5%                      | 0.09    |
| Post-discharge follow-up on PCP appointment       | 61.2%                             | 43.9%                                           | 0.03    | 51.8%                     | 57.3%                      | 0.44    |
| Selective referral to HHAs based on quality       | 71.5%                             | 62.9%                                           | 0.23    | 67.0%                     | 70.0%                      | 0.65    |
| Care pathways to reduce readmissions              | 78.6%                             | 73.7%                                           | 0.43    | 69.3%                     | 83.4%                      | 0.03    |
| Formal screening for SDoH                         | 72.5%                             | 65.7%                                           | 0.36    | 71.0%                     | 69.9%                      | 0.88    |
| Formal processes to directly address SDoH         | 70.0%                             | 57.8%                                           | 0.11    | 67.5%                     | 65.0%                      | 0.72    |
| Post-discharge referrals to community resources   | 90.5%                             | 87.0%                                           | 0.41    | 87.6%                     | 90.5%                      | 0.47    |
| Staff training on patients with cognitive decline | 87.9%                             | 84.6%                                           | 0.50    | 88.6%                     | 86.0%                      | 0.56    |
| Dementia focused short stay unit                  | 20.4%                             | 12.7%                                           | 0.17    | 15.7%                     | 20.5%                      | 0.36    |
| Dementia occupational therapy                     | 61.6%                             | 53.7%                                           | 0.30    | 51.8%                     | 64.4%                      | 0.07    |



|                                                   |       |       |      |       |       |      |
|---------------------------------------------------|-------|-------|------|-------|-------|------|
| Tracking of hospital readmissions during stay     | 92.8% | 95.9% | 0.35 | 94.8% | 92.7% | 0.54 |
| Tracking of hospital readmissions post-discharge  | 75.0% | 67.5% | 0.25 | 66.9% | 76.3% | 0.13 |
| Tracking of repeat ED visits during stay          | 90.5% | 90.9% | 0.94 | 90.2% | 90.7% | 0.90 |
| Tracking of repeat ED visits post-discharge       | 48.3% | 47.3% | 0.90 | 45.4% | 48.1% | 0.70 |
| Tracking of PCP follow-up post-discharge          | 50.2% | 33.7% | 0.03 | 40.8% | 48.1% | 0.30 |
| Patient experience surveys                        | 78.3% | 74.8% | 0.63 | 75.7% | 77.4% | 0.79 |
| <b>Barriers</b>                                   | 5.1   | 4.8   |      | 5.5   | 4.5   |      |
| Lack of access to non-emergent transport          | 38.0% | 26.6% | 0.15 | 34.5% | 34.3% | 0.98 |
| Inadequate availability of high-quality HHA       | 15.6% | 14.9% | 0.91 | 17.1% | 14.1% | 0.58 |
| Lack of patient social support                    | 65.1% | 69.3% | 0.55 | 63.1% | 68.0% | 0.47 |
| Inadequate mental health services                 | 66.9% | 60.6% | 0.38 | 66.3% | 62.5% | 0.58 |
| Inadequate substance abuse services               | 48.7% | 41.4% | 0.34 | 42.2% | 49.5% | 0.30 |
| Difficulty in forging affiliations with hospitals | 17.1% | 10.8% | 0.22 | 15.2% | 14.3% | 0.85 |
| Difficulty in forging affiliations with HHAs      | 14.3% | 8.1%  | 0.17 | 13.8% | 10.7% | 0.48 |
| Lack of staff buy in for changes                  | 28.5% | 13.0% | 0.01 | 28.6% | 19.5% | 0.12 |
| Lack of funding for new programs                  | 35.7% | 45.8% | 0.17 | 50.0% | 29.5% | 0.00 |
| Lack of data to assess facility quality           | 15.7% | 20.5% | 0.37 | 27.6% | 8.6%  | 0.00 |
| Lack of personnel to support care adoptions       | 51.3% | 47.8% | 0.64 | 59.5% | 42.6% | 0.02 |
| Staff turnover and burnout                        | 73.5% | 74.1% | 0.92 | 78.0% | 70.9% | 0.26 |

*Note:* Pearson Chi-square tests performed. ED is emergency department. EHR is electronic health record. HHA is home health agency. MD is medical doctor. NP is nurse practitioner. PCP is primary care physician. SDoH is social determinants of health. SNF is skilled nursing facility.

**Supplementary Table S8** Frequency of reported care delivery approaches and barriers by quality rating and minority quartiles

|                                                 | Overall Quality Rating<br>n=374 |                             |                                  |         | Minority<br>n=377                     |                                      |                                        |         |
|-------------------------------------------------|---------------------------------|-----------------------------|----------------------------------|---------|---------------------------------------|--------------------------------------|----------------------------------------|---------|
|                                                 | 1-2 Stars<br>n = 134<br>%= 35.8 | 3 Stars<br>n = 71<br>% = 19 | 4-5 Stars<br>n = 169<br>% = 45.2 | p-value | Lowest Quartile<br>n = 98<br>% = 26.0 | 2-3 Quartiles<br>n = 185<br>% = 49.1 | Highest Quartile<br>n = 94<br>% = 24.9 | p-value |
|                                                 | % or mean                       | % or mean                   | % or mean                        |         | % or mean                             | % or mean                            | % or mean                              |         |
| <b>Care Delivery Approaches</b>                 | 16.9                            | 17.1                        | 16.5                             |         | 16.8                                  | 17.3                                 | 15.6                                   |         |
| Condition-specific care pathways/protocols      | 61.0%                           | 77.5%                       | 60.5%                            | 0.18    | 60.2%                                 | 71.0%                                | 53.9%                                  | 0.13    |
| Data analytics to identify high-risk residents  | 75.8%                           | 62.3%                       | 79.1%                            | 0.13    | 80.7%                                 | 75.2%                                | 67.6%                                  | 0.28    |
| Huddles or team review of patient census        | 96.7%                           | 99.7%                       | 98.2%                            | 0.28    | 97.3%                                 | 99.9%                                | 94.9%                                  | 0.03    |
| Use of MD or NP focused on SNF care             | 84.4%                           | 93.0%                       | 76.9%                            | 0.08    | 78.0%                                 | 88.5%                                | 76.4%                                  | 0.15    |
| Education on shorter length of stay             | 84.3%                           | 90.0%                       | 82.6%                            | 0.54    | 83.3%                                 | 83.8%                                | 87.6%                                  | 0.78    |
| Medication reconciliation on discharge          | 97.7%                           | 95.0%                       | 97.7%                            | 0.65    | 98.1%                                 | 96.9%                                | 96.7%                                  | 0.87    |
| Use of discharge check list                     | 96.5%                           | 89.8%                       | 97.3%                            | 0.10    | 97.3%                                 | 93.4%                                | 98.4%                                  | 0.20    |
| Post-discharge follow-up on clinical needs      | 82.3%                           | 71.3%                       | 71.1%                            | 0.20    | 73.6%                                 | 78.1%                                | 69.6%                                  | 0.54    |
| Post-discharge follow-up on PCP appointment     | 65.0%                           | 54.4%                       | 49.2%                            | 0.12    | 56.8%                                 | 58.7%                                | 47.3%                                  | 0.43    |
| Selective referral to HHAs based on quality     | 66.9%                           | 61.8%                       | 72.8%                            | 0.44    | 76.9%                                 | 74.3%                                | 48.0%                                  | 0.00    |
| Care pathways to reduce readmissions            | 75.6%                           | 83.5%                       | 75.9%                            | 0.59    | 77.9%                                 | 82.2%                                | 66.5%                                  | 0.12    |
| Formal screening for SDoH                       | 67.4%                           | 77.9%                       | 69.8%                            | 0.55    | 70.7%                                 | 69.6%                                | 72.1%                                  | 0.96    |
| Formal processes to directly address SDoH       | 63.8%                           | 76.5%                       | 64.2%                            | 0.39    | 66.9%                                 | 67.9%                                | 62.7%                                  | 0.84    |
| Post-discharge referrals to community resources | 89.0%                           | 90.1%                       | 89.5%                            | 0.98    | 90.7%                                 | 86.8%                                | 93.2%                                  | 0.41    |

|                                                   |            |            |            |      |            |            |            |      |
|---------------------------------------------------|------------|------------|------------|------|------------|------------|------------|------|
| Staff training on patients with cognitive decline | 88.1%      | 88.2%      | 85.5%      | 0.83 | 89.6%      | 83.8%      | 89.9%      | 0.41 |
| Dementia focused short stay unit                  | 20.0%      | 19.8%      | 15.8%      | 0.73 | 17.8%      | 20.1%      | 13.9%      | 0.64 |
| Dementia occupational therapy                     | 63.9%      | 56.6%      | 56.4%      | 0.58 | 53.8%      | 66.8%      | 49.6%      | 0.10 |
| Tracking of hospital readmissions during stay     | 93.8%      | 92.5%      | 94.1%      | 0.94 | 95.1%      | 92.8%      | 94.0%      | 0.84 |
| Tracking of hospital readmissions post-discharge  | 77.1%      | 73.4%      | 68.7%      | 0.46 | 67.9%      | 79.1%      | 63.3%      | 0.09 |
| Tracking of repeat ED visits during stay          | 94.1%      | 84.4%      | 90.3%      | 0.33 | 95.2%      | 91.8%      | 82.5%      | 0.07 |
| Tracking of repeat ED visits post-discharge       | 47.1%      | 43.5%      | 50.2%      | 0.78 | 46.5%      | 56.1%      | 32.3%      | 0.03 |
| Tracking of PCP follow-up post-discharge          | 43.5%      | 57.0%      | 41.8%      | 0.29 | 49.4%      | 46.7%      | 34.6%      | 0.26 |
| Patient experience surveys                        | 71.9%      | 80.4%      | 80.0%      | 0.45 | 79.9%      | 77.6%      | 70.8%      | 0.57 |
| <b>Barriers</b>                                   | <b>5.8</b> | <b>4.4</b> | <b>4.5</b> |      | <b>5.8</b> | <b>4.7</b> | <b>4.5</b> |      |
| Lack of access to non-emergent transport          | 40.7%      | 39.0%      | 27.9%      | 0.18 | 40.9%      | 34.2%      | 25.3%      | 0.23 |
| Inadequate availability of high-quality HHA       | 19.3%      | 6.7%       | 15.6%      | 0.22 | 22.1%      | 13.9%      | 9.2%       | 0.16 |
| Lack of patient social support                    | 75.7%      | 61.4%      | 61.3%      | 0.11 | 65.7%      | 68.3%      | 62.0%      | 0.77 |
| Inadequate mental health services                 | 78.3%      | 53.2%      | 58.9%      | 0.01 | 76.0%      | 60.5%      | 59.7%      | 0.10 |
| Inadequate substance abuse services               | 57.9%      | 35.2%      | 41.7%      | 0.04 | 42.3%      | 47.6%      | 50.7%      | 0.67 |
| Difficulty in forging affiliations with hospitals | 18.8%      | 16.3%      | 11.9%      | 0.41 | 16.3%      | 12.0%      | 19.3%      | 0.46 |
| Difficulty in forging affiliations with HHAs      | 17.8%      | 13.0%      | 7.8%       | 0.11 | 15.3%      | 6.9%       | 18.8%      | 0.06 |
| Lack of staff buy in for changes                  | 33.1%      | 16.4%      | 18.8%      | 0.04 | 33.1%      | 15.9%      | 25.5%      | 0.03 |
| Lack of funding for new programs                  | 42.8%      | 34.6%      | 37.6%      | 0.66 | 49.2%      | 35.0%      | 32.2%      | 0.11 |
| Lack of data to assess facility quality           | 22.8%      | 10.7%      | 15.2%      | 0.19 | 24.5%      | 15.2%      | 13.5%      | 0.21 |
| Lack of personnel to support care adoptions       | 54.1%      | 52.1%      | 46.4%      | 0.59 | 61.1%      | 45.9%      | 45.6%      | 0.14 |
| Staff turnover and burnout                        | 78.9%      | 64.1%      | 73.2%      | 0.28 | 81.2%      | 75.6%      | 60.6%      | 0.06 |

*Note:* Pearson Chi-square tests performed. ED is emergency department. EHR is electronic health record. HHA is home health agency. MD is medical doctor. NP is nurse practitioner. PCP is primary care physician. SDoH is social determinants of health. SNF is skilled nursing facility.

**Supplementary Table S9** Average shares of residents with cognitive impairment in facilities with and without each of the dementia-focused care delivery approaches

| <b>Dementia-focused delivery approach</b> | <b>Cognitive deficiency training</b> |           | <b>Dementia Focused Short Stay Unit</b> |           | <b>Dementia Occupational Therapy</b> |           |
|-------------------------------------------|--------------------------------------|-----------|-----------------------------------------|-----------|--------------------------------------|-----------|
|                                           | <b>YES</b>                           | <b>NO</b> | <b>YES</b>                              | <b>NO</b> | <b>YES</b>                           | <b>NO</b> |
| Low CFS                                   | 47.00%                               | 49.12%    | 44.19%                                  | 48.07%    | 47.47%                               | 47.17%    |
| Moderate CFS                              | 0.03%                                | 0.07%     | 0.01%                                   | 0.04%     | 0.03%                                | 0.04%     |
| Severe CFS                                | 4.04%                                | 3.60%     | 4.29%                                   | 3.90%     | 4.09%                                | 3.80%     |

*Note:* CFS is cognitive function scale.

Thank you for participating in the **Survey of U.S. Skilled Nursing Facilities**. COVID-19 has created numerous challenges for nursing homes caring for long- and short stay patients and facilities have seen a falloff in revenue on the short stay side. Thus, payment issues for short stay nursing home patients continue to be critically important for SNFs financial success. With support from the National Institute of Aging, researchers at the Harvard T.H. Chan School of Public Health and Washington University in Saint Louis are fielding this survey to understand skilled nursing facilities’ priorities, strategies, and challenges **for short-stay residents** around new payment systems. This survey has been endorsed by the American Health Care Association (AHCA) and LeadingAge. The survey will take about 15 minutes to complete. We have enclosed a \$100 check to thank you for your valuable time.

Your participation is critical to inform these findings, but this survey is voluntary. Please have this survey filled out by the SNF administrator, the Executive Director or the person in your skilled nursing facility that is most knowledgeable about clinical strategies. All responses are **private and confidential**. Results will be analyzed only in the aggregate and no individual responses will be reported. Please respond to the following questions.

**SURVEY INFORMATION**

- For each question, please check the box or boxes next to the most appropriate answer or answers.
- Please answer all questions unless directed otherwise.
- When you have completed the survey, please return it in the enclosed postage-paid envelope.

**SURVEY OF U.S. SKILLED NURSING FACILITIES**

**SECTION 1: RESPONDENT AND CARE SETTINGS**

1. What is your position at: [INSERT SNF FACILITY NAME AND ADDRESS FROM SAMPLE]?

**Please select all that apply.**

- SNF Administrator
- Executive Director
- Other Administrator (PLEASE SPECIFY: \_\_\_\_\_)

2. What types of services are offered at your facility? **Please record a response for each item below.**

| Types of Facility Services                  | Yes                      | No                       | Don't Know               |
|---------------------------------------------|--------------------------|--------------------------|--------------------------|
| Short stay rehab care                       | <input type="checkbox"/> | <input type="checkbox"/> | <input type="checkbox"/> |
| Long term care                              | <input type="checkbox"/> | <input type="checkbox"/> | <input type="checkbox"/> |
| Assisted/independent living                 | <input type="checkbox"/> | <input type="checkbox"/> | <input type="checkbox"/> |
| Dementia care unit for short stay residents | <input type="checkbox"/> | <input type="checkbox"/> | <input type="checkbox"/> |
| Dementia care unit for long stay residents  | <input type="checkbox"/> | <input type="checkbox"/> | <input type="checkbox"/> |

## SECTION 2: PARTICIPATION IN ALTERNATIVE PAYMENT METHODS

This section concerns “**alternative payment models**,” or payment models besides the standard Medicare Part A RUG model or the new patient-driven payment model. Examples of alternative payment models include episode-based payment (also known as “bundled payments”), accountable care organizations and other value-based payment models.

3. Do you participate in any alternative payment models, such as episode-based payment (“bundled” payments), accountable care organization contracts or other value-based purchasing? “Participation” means that your facility has financial exposure to the alternative payment model of meaningful importance for your facility.

- Yes      **Continue to Question 4**  
 No                      **Skip to Question 5**  
 Don't Know

4. Please indicate which of the following payment models you have participated in over the past 2 years and with which payer. **Please check all that apply for each item below.**

| Payment Models                    | Fee for Service (Standard) Medicare | Medicaid                 | Medicare Advantage (Part C) | None                     | Don't Know               |
|-----------------------------------|-------------------------------------|--------------------------|-----------------------------|--------------------------|--------------------------|
| Episode-based or bundled payment  | <input type="checkbox"/>            | <input type="checkbox"/> | <input type="checkbox"/>    | <input type="checkbox"/> | <input type="checkbox"/> |
| Accountable care organization     | <input type="checkbox"/>            | <input type="checkbox"/> | <input type="checkbox"/>    | <input type="checkbox"/> | <input type="checkbox"/> |
| Other pay-for-performance program | <input type="checkbox"/>            | <input type="checkbox"/> | <input type="checkbox"/>    | <input type="checkbox"/> | <input type="checkbox"/> |

## SECTION 3: CARE REDESIGN

5. Below is a list of care redesign initiatives that SNFs might pursue. Please indicate whether each tool or strategy is currently used by your SNF for **short-stay residents**. **Please record a response for each item below.**

| I. Short-Stay Care Redesign                                                                      | Currently Use            |                          |                          |
|--------------------------------------------------------------------------------------------------|--------------------------|--------------------------|--------------------------|
|                                                                                                  | Yes                      | No                       | Don't Know               |
| Condition-specific care pathways or protocols for SNF care                                       | <input type="checkbox"/> | <input type="checkbox"/> | <input type="checkbox"/> |
| EHR or other data-based analytics to identify high-risk short-stay residents                     | <input type="checkbox"/> | <input type="checkbox"/> | <input type="checkbox"/> |
| Huddles or regular review of patient census as a team                                            | <input type="checkbox"/> | <input type="checkbox"/> | <input type="checkbox"/> |
| Use of physician or nurse practitioner focused on SNF care (i.e. “SNFist”)                       | <input type="checkbox"/> | <input type="checkbox"/> | <input type="checkbox"/> |
| Educating short-stay residents/families to anticipate a shorter length of stay                   | <input type="checkbox"/> | <input type="checkbox"/> | <input type="checkbox"/> |
| Medication reconciliation on discharge                                                           | <input type="checkbox"/> | <input type="checkbox"/> | <input type="checkbox"/> |
| Use of discharge check list                                                                      | <input type="checkbox"/> | <input type="checkbox"/> | <input type="checkbox"/> |
| Post-discharge follow up to check in on clinical needs and prevent rehospitalization             | <input type="checkbox"/> | <input type="checkbox"/> | <input type="checkbox"/> |
| Post-discharge follow-up to confirm appointment completed with primary care physician            | <input type="checkbox"/> | <input type="checkbox"/> | <input type="checkbox"/> |
| Selective referral to HHAs based on quality                                                      | <input type="checkbox"/> | <input type="checkbox"/> | <input type="checkbox"/> |
| Care pathways to reduce re-hospitalization of current short-stay residents (e.g. INTERACT model) | <input type="checkbox"/> | <input type="checkbox"/> | <input type="checkbox"/> |

6. Below is a list of initiatives focused on social determinants that SNFs might pursue. Please indicate whether each tool or strategy is currently used by your SNF for **short-stay residents**. Please record a response for each item below.

| II. Social Determinants / Vulnerable Populations                                                     | Currently Use            |                          |                          |
|------------------------------------------------------------------------------------------------------|--------------------------|--------------------------|--------------------------|
|                                                                                                      | Yes                      | No                       | Don't Know               |
| Formal screening for problems with transportation, food, or housing                                  | <input type="checkbox"/> | <input type="checkbox"/> | <input type="checkbox"/> |
| Formal processes for directly addressing social determinants such as transportation, food or housing | <input type="checkbox"/> | <input type="checkbox"/> | <input type="checkbox"/> |
| Post-discharge patient referrals to community resources to address social determinants of health     | <input type="checkbox"/> | <input type="checkbox"/> | <input type="checkbox"/> |

7. Below is a list of initiatives focused on patients with cognitive impairment or dementia that SNFs might pursue. Please indicate whether each tool or strategy is currently used by your SNF for **short-stay residents**. Please record a response for each item below.

| III. Cognitive Impairment                                                                      | Currently Use            |                          |                          |
|------------------------------------------------------------------------------------------------|--------------------------|--------------------------|--------------------------|
|                                                                                                | Yes                      | No                       | Don't Know               |
| Special training for staff caring for patients with cognitive decline                          | <input type="checkbox"/> | <input type="checkbox"/> | <input type="checkbox"/> |
| Specific physical unit for short stay patients with dementia                                   | <input type="checkbox"/> | <input type="checkbox"/> | <input type="checkbox"/> |
| Enhanced occupational therapy for patients with dementia (e.g. kitchen simulation environment) | <input type="checkbox"/> | <input type="checkbox"/> | <input type="checkbox"/> |

**SECTION 4: BARRIERS AND CONTEXT**

8. Please indicate whether the following factors posed a barrier to reducing spending or improving care for your short-stay residents, regardless of payment type. Please record a response for each item below.

| <b>Does this pose a barrier to reducing spending or improving care?</b>                                            |                                  |                                         |                          |
|--------------------------------------------------------------------------------------------------------------------|----------------------------------|-----------------------------------------|--------------------------|
|                                                                                                                    | <b>Yes, this poses a barrier</b> | <b>No, this does not pose a barrier</b> | <b>Don't Know</b>        |
| <b>Care During SNF Stay</b>                                                                                        |                                  |                                         |                          |
| Inadequate availability or accessibility of non-emergent transportation services for appointment while at facility | <input type="checkbox"/>         | <input type="checkbox"/>                | <input type="checkbox"/> |
| <b>Post Discharge Care</b>                                                                                         |                                  |                                         |                          |
| Inadequate availability of high-quality HHA in the area                                                            | <input type="checkbox"/>         | <input type="checkbox"/>                | <input type="checkbox"/> |
| Difficulty with patients' lack of social support (e.g. living alone)                                               | <input type="checkbox"/>         | <input type="checkbox"/>                | <input type="checkbox"/> |
| Inadequate availability or accessibility of mental health services                                                 | <input type="checkbox"/>         | <input type="checkbox"/>                | <input type="checkbox"/> |
| Inadequate availability or accessibility of substance use treatment services                                       | <input type="checkbox"/>         | <input type="checkbox"/>                | <input type="checkbox"/> |
| <b>Facility Resources and Staff</b>                                                                                |                                  |                                         |                          |
| Difficulty in forging effective affiliations with hospitals                                                        | <input type="checkbox"/>         | <input type="checkbox"/>                | <input type="checkbox"/> |
| Difficulty in forging effective affiliations with HHAs                                                             | <input type="checkbox"/>         | <input type="checkbox"/>                | <input type="checkbox"/> |
| Difficulty getting buy-in from facility staff to implement changes                                                 | <input type="checkbox"/>         | <input type="checkbox"/>                | <input type="checkbox"/> |
| Inadequate financial resources to implement new programs                                                           | <input type="checkbox"/>         | <input type="checkbox"/>                | <input type="checkbox"/> |
| Insufficient availability of analytics and data to assess your facility's quality and cost performance             | <input type="checkbox"/>         | <input type="checkbox"/>                | <input type="checkbox"/> |
| Lack of personnel to support care innovations                                                                      | <input type="checkbox"/>         | <input type="checkbox"/>                | <input type="checkbox"/> |
| Staff turnover and/or burnout                                                                                      | <input type="checkbox"/>         | <input type="checkbox"/>                | <input type="checkbox"/> |

**SECTION 5: QUALITY**

9. Do you collect data and monitor performance over time for the following performance indicators for your short-stay residents?

Please record a response for each item below.

|                                                                      | <b>Currently collect data and monitor performance</b> |                          |                          |
|----------------------------------------------------------------------|-------------------------------------------------------|--------------------------|--------------------------|
|                                                                      | <b>Yes</b>                                            | <b>No</b>                | <b>Don't Know</b>        |
| Readmission to acute care hospital during SNF stay                   | <input type="checkbox"/>                              | <input type="checkbox"/> | <input type="checkbox"/> |
| Readmission to acute care hospital after SNF discharge               | <input type="checkbox"/>                              | <input type="checkbox"/> | <input type="checkbox"/> |
| Repeat emergency room visits during SNF stay                         | <input type="checkbox"/>                              | <input type="checkbox"/> | <input type="checkbox"/> |
| Repeat emergency room visits after SNF discharge                     | <input type="checkbox"/>                              | <input type="checkbox"/> | <input type="checkbox"/> |
| Post-SNF discharge ambulatory follow-up with PCP or other physicians | <input type="checkbox"/>                              | <input type="checkbox"/> | <input type="checkbox"/> |
| Patient experience surveys                                           | <input type="checkbox"/>                              | <input type="checkbox"/> | <input type="checkbox"/> |



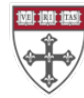

**SECTION 6: RELATIONSHIPS WITH OTHER INSTITUTIONS**

10. Below is a list of the types of relationships you might have with various institutions. Please indicate whether these relationships exist. **Please record a response for each item below.**

| Relationships with Hospitals                               | Does this type of relationship currently exist? |                          |                          |
|------------------------------------------------------------|-------------------------------------------------|--------------------------|--------------------------|
|                                                            | Yes                                             | No                       | Don't Know               |
| Preferred Network for Hospital Discharges to Your Facility | <input type="checkbox"/>                        | <input type="checkbox"/> | <input type="checkbox"/> |
| Financial Integration                                      | <input type="checkbox"/>                        | <input type="checkbox"/> | <input type="checkbox"/> |
| EHR integration or data sharing                            | <input type="checkbox"/>                        | <input type="checkbox"/> | <input type="checkbox"/> |
| Relationships with Home Health Agencies                    |                                                 |                          |                          |
| Preferred Network for Your Facility's Discharges           | <input type="checkbox"/>                        | <input type="checkbox"/> | <input type="checkbox"/> |
| EHR integration or data sharing                            | <input type="checkbox"/>                        | <input type="checkbox"/> | <input type="checkbox"/> |

11. Did alternative payment models substantially influence the formations of these relationships?

| Relationships with Hospitals                               | Formation of relationship influenced by an alternative payment model |                          |                          |                          |
|------------------------------------------------------------|----------------------------------------------------------------------|--------------------------|--------------------------|--------------------------|
|                                                            | Yes                                                                  | No                       | Don't Know               | Not Applicable           |
| Preferred Network for Hospital Discharges to Your Facility | <input type="checkbox"/>                                             | <input type="checkbox"/> | <input type="checkbox"/> | <input type="checkbox"/> |
| Financial Integration                                      | <input type="checkbox"/>                                             | <input type="checkbox"/> | <input type="checkbox"/> | <input type="checkbox"/> |
| EHR integration or data sharing                            | <input type="checkbox"/>                                             | <input type="checkbox"/> | <input type="checkbox"/> | <input type="checkbox"/> |
| Relationships with Home Health Agencies                    |                                                                      |                          |                          |                          |
| Preferred Network for Your Facility's Discharges           | <input type="checkbox"/>                                             | <input type="checkbox"/> | <input type="checkbox"/> | <input type="checkbox"/> |
| EHR integration or data sharing                            | <input type="checkbox"/>                                             | <input type="checkbox"/> | <input type="checkbox"/> | <input type="checkbox"/> |

**SECTION 7: ADAPTING TO THE PATIENT DRIVEN PAYMENT MODEL (PDPM)**

12. Overall, how difficult has it been for your facility to adapt to the "Patient Driven Payment Model," (PDPM), Medicare's new billing system for skilled nursing facilities?

- Not Difficult
- Slightly Difficult
- Moderately Difficult
- Very Difficult
- Don't Know

13. How difficult has it been for your facility to conduct the following tasks relating to the Patient Driven Payment Model (PDPM)? **Please record a response for each item below.**

|                                                         | Not Difficult            | Slightly Difficult       | Moderately Difficult     | Very Difficult           | Don't Know               |
|---------------------------------------------------------|--------------------------|--------------------------|--------------------------|--------------------------|--------------------------|
| Identifying medical comorbidities necessary for billing | <input type="checkbox"/> |
| Measuring functional score necessary for billing        | <input type="checkbox"/> |
| Understanding financial changes for your facility       | <input type="checkbox"/> |
| Training billing staff                                  | <input type="checkbox"/> |
| Training clinical staff                                 | <input type="checkbox"/> |

14. Has the Patient Driven Payment Model changed the following aspects of care delivery in your SNF, either more, less, or no change, compared to the prior 2 years? **Please record a response for each item below.**

|                                          | More                     | Less                     | No Change                | Don't Know               |
|------------------------------------------|--------------------------|--------------------------|--------------------------|--------------------------|
| Amount of physical therapy               | <input type="checkbox"/> | <input type="checkbox"/> | <input type="checkbox"/> | <input type="checkbox"/> |
| Amount of occupational therapy           | <input type="checkbox"/> | <input type="checkbox"/> | <input type="checkbox"/> | <input type="checkbox"/> |
| Amount of speech and swallow therapy     | <input type="checkbox"/> | <input type="checkbox"/> | <input type="checkbox"/> | <input type="checkbox"/> |
| Length of stay                           | <input type="checkbox"/> | <input type="checkbox"/> | <input type="checkbox"/> | <input type="checkbox"/> |
| Admissions of complex/high-cost patients | <input type="checkbox"/> | <input type="checkbox"/> | <input type="checkbox"/> | <input type="checkbox"/> |
| Clinical documentation                   | <input type="checkbox"/> | <input type="checkbox"/> | <input type="checkbox"/> | <input type="checkbox"/> |

15. Has the Patient Driven Payment Model led to a change in the number of staff or total full-time equivalents of these types in your SNF, either more, less, or no change compared to the prior 2 years? **Please record a response for each item below.**

|                                             | More                     | Less                     | No Change                | Don't Know               |
|---------------------------------------------|--------------------------|--------------------------|--------------------------|--------------------------|
| Physical therapists                         | <input type="checkbox"/> | <input type="checkbox"/> | <input type="checkbox"/> | <input type="checkbox"/> |
| Occupational therapists                     | <input type="checkbox"/> | <input type="checkbox"/> | <input type="checkbox"/> | <input type="checkbox"/> |
| Speech and swallow therapists               | <input type="checkbox"/> | <input type="checkbox"/> | <input type="checkbox"/> | <input type="checkbox"/> |
| Nurses (RNs or LPNs)                        | <input type="checkbox"/> | <input type="checkbox"/> | <input type="checkbox"/> | <input type="checkbox"/> |
| Therapy aides                               | <input type="checkbox"/> | <input type="checkbox"/> | <input type="checkbox"/> | <input type="checkbox"/> |
| Nursing aides                               | <input type="checkbox"/> | <input type="checkbox"/> | <input type="checkbox"/> | <input type="checkbox"/> |
| Nurse practitioners or physician assistants | <input type="checkbox"/> | <input type="checkbox"/> | <input type="checkbox"/> | <input type="checkbox"/> |
| Physicians                                  | <input type="checkbox"/> | <input type="checkbox"/> | <input type="checkbox"/> | <input type="checkbox"/> |
| Administrative/billing staff                | <input type="checkbox"/> | <input type="checkbox"/> | <input type="checkbox"/> | <input type="checkbox"/> |
| Medication technicians or aides             | <input type="checkbox"/> | <input type="checkbox"/> | <input type="checkbox"/> | <input type="checkbox"/> |

16. Do any of the following issues pose a challenge for your success with the Patient Driven Payment Model? **Please record a response for each item below.**

|                                                              | Not Challenging          | Slightly Challenging     | Moderately Challenging   | Very Challenging         | Don't know               |
|--------------------------------------------------------------|--------------------------|--------------------------|--------------------------|--------------------------|--------------------------|
| Getting accurate, timely DRG diagnoses from hospital         | <input type="checkbox"/> |
| Obtaining financial resources                                | <input type="checkbox"/> |
| Hiring new staff                                             | <input type="checkbox"/> |
| Staff turnover and/or burnout                                | <input type="checkbox"/> |
| Engaging current staff to implement changes                  | <input type="checkbox"/> |
| Procuring and using analytics and data to assess performance | <input type="checkbox"/> |
| Patient/family expectations for length of stay or therapy    | <input type="checkbox"/> |
| Managing multiple different payment models                   | <input type="checkbox"/> |

17. In the next 2 years, how will the Patient Driven Payment Model affect the following aspects of care delivery at **your** skilled nursing facility? **Please record a response for each item below.**

|                       | <b>Much Worse</b>        | <b>Somewhat Worse</b>    | <b>No Change</b>         | <b>Somewhat Better</b>   | <b>Much Better</b>       | <b>Don't know</b>        |
|-----------------------|--------------------------|--------------------------|--------------------------|--------------------------|--------------------------|--------------------------|
| Quality of care       | <input type="checkbox"/> |
| Financial performance | <input type="checkbox"/> |
| Retention of staff    | <input type="checkbox"/> |
| Patient experience    | <input type="checkbox"/> |

**CONCLUSION**

If you have any anything you would like to add, please give us your thoughts here. Often these thoughts turn out to be the most important part of the survey.

Thank you very much for your response and participation in this survey. If you would like us to send you the results of the research once it is complete, please provide your email address here. We will not share this address or use it for any other purpose.

Email Address: \_\_\_\_\_

I do not wish to receive a copy of the findings.

**That completes the survey. To ensure that your survey reaches us, please return it in the enclosed postage-paid envelope to:**
